# Supplementary material for: miR-17-3p Contributes to Exercise-Induced Cardiac Growth and Protects against Myocardial Ischemia-Reperfusion Injury
Source: PubMed Central journal article supplement — Theranostics. 2017 Jan 15;7(3):664–76. doi: 10.7150/thno.15162 (PMC5327641; doi:10.7150/thno.15162), 2017-01-15

## Supplemental Figure Legends

**Supplemental Figure 1 Exercise-associated elevation of contractile protein expressions was attenuated by miR-17-3p inhibition.** Western blot for contractile proteins including  $\alpha$ -actinin and cardiac Troponin I (cTnI), as well as cytoskeleton protein Desmin. n=3 per group. \*, P<0.05, \*\*, P<0.01, \*\*\*, P<0.001 versus respective control.

**Supplemental Figure 2 miR-17-3p is not sufficient to recapitulate the phenotype observed in exercised heart.**

(A) Mice were injected via tail vein with 30 mg/kg agomiR or scramble control for 3 consecutive days and harvested after 2 weeks, which upregulated miR-17-3p expression level in heart at a comparable level to that in exercised heart. n=5 per group.

(B) Heart weight/body weight (HW/BW) and heart weight/tibia length (HW/TL) ratios were not altered in mice treated with miR-17-3p agomiR. n=6 per group.

(C) Wheat germ agglutinin (WGA) staining showed that cardiomyocyte area was not modified in mice treated with miR-17-3p agomiR. n=4 per group.

(D) Immunohistochemical staining for  $\alpha$ -actinin and EdU showed no difference in cardiomyocyte proliferation between mice treated with negative control (NC) and miR-17-3p agomiR. n=4 per group.

\*, P<0.05, \*\*, P<0.01, \*\*\*, P<0.001 versus respective control.

# Supplemental Figure 1

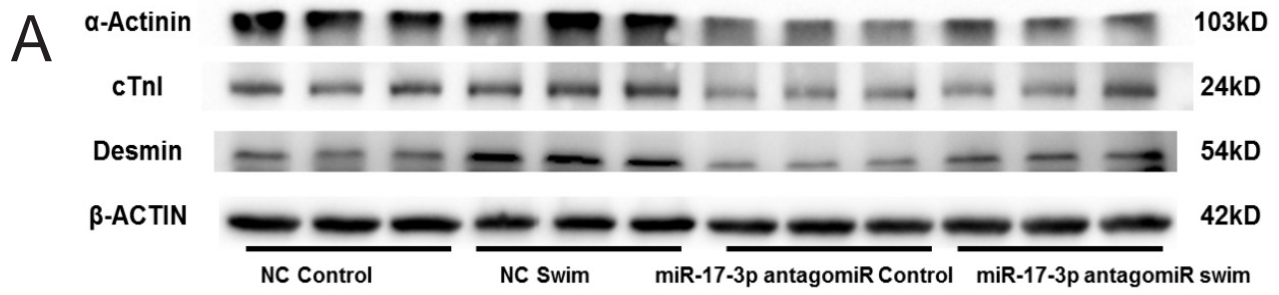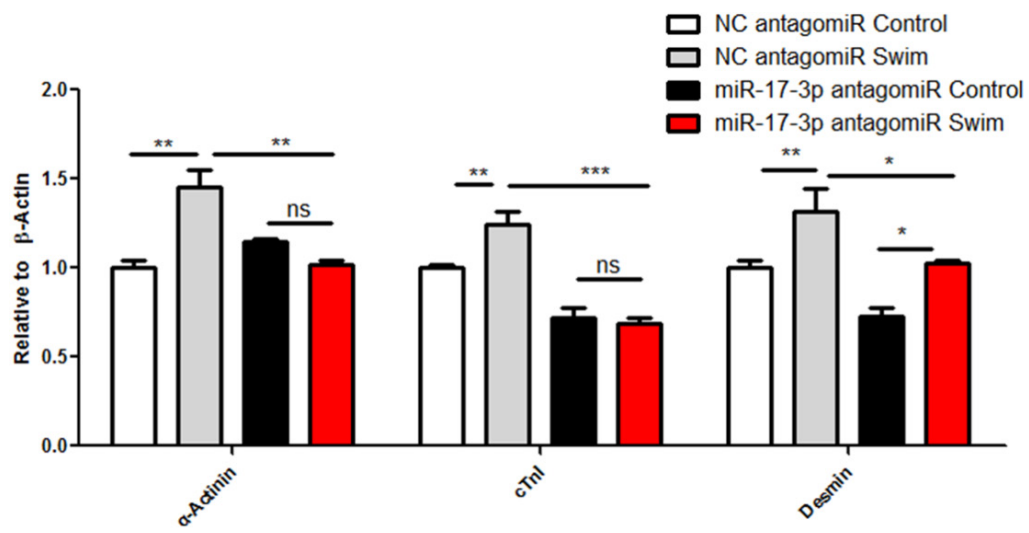

# Supplemental Figure 2

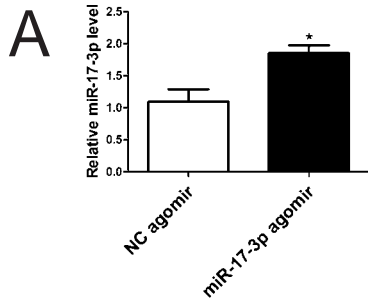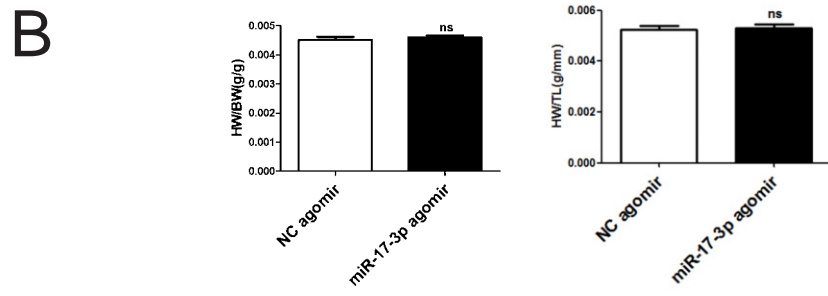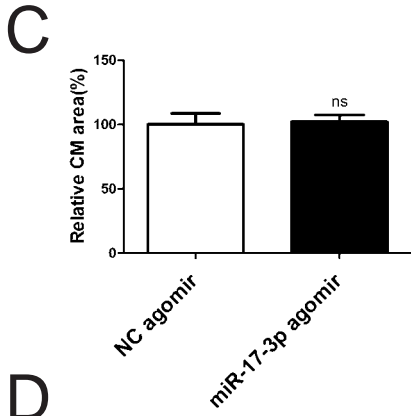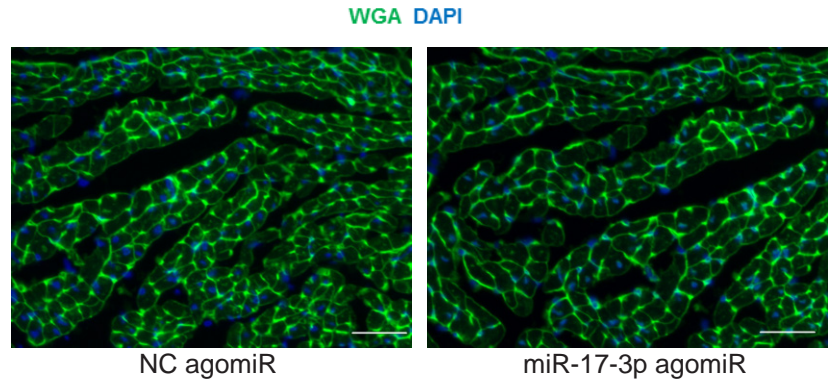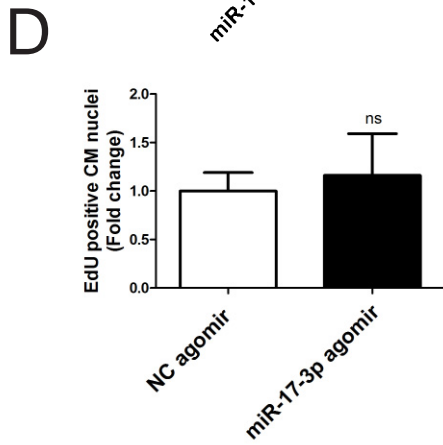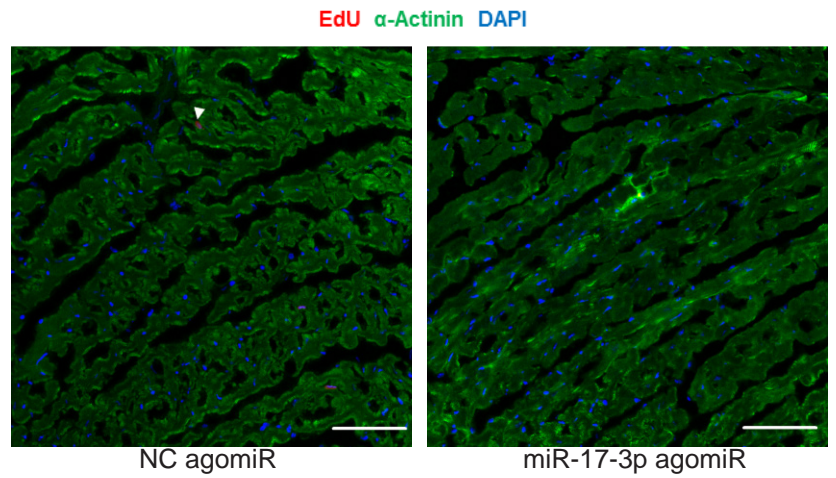

Supplement: thnov07p0664s1.pdf [file thnov07p0664s1.pdf]
